# Supplementary material for: Effective Activation of Peroxymonosulfate by Oxygen Vacancy Induced Musa Basjoo Biochar to Degrade Sulfamethoxazole: Efficiency and Mechanism
Source: MDPI journal article supplement (doi:10.3390/toxics12040283), 2024-04-12
Supplement: s1 [file s1]

## Supporting Information

### Effective activation of peroxymonosulfate by oxygen vacancy induced Musa basjoo biochar to degradation sulfamethoxazole: efficiency and mechanism

*Shuqi Li <sup>1,2</sup>, Jian Yang <sup>2</sup>, Kaiwen Zheng <sup>2</sup>, Shilong He <sup>1</sup>, Zhigang Liu <sup>3</sup>, Shuang  
Song <sup>4</sup>, and Tao Zeng <sup>4,\*</sup>*

<sup>1</sup> School of Environment and Spatial Informatics, China University of Mining and Technology, Xuzhou 221116, China

<sup>2</sup> Ecology and Health Institute, Hangzhou Vocational & Technical College, Hangzhou, PR China

<sup>3</sup> Ningbo Water & Environment Group, Ningbo 315100, P.R. China

<sup>4</sup> Key Laboratory of Microbial Technology for Industrial Pollution Control of Zhejiang Province, College of Environment, Zhejiang University of Technology, Hangzhou, Zhejiang, 310032, P.R. China

**\* Corresponding Author**

Tao Zeng.

Email: zengtao@zjut.edu.cn; Tel: +86-571-88320726.

## Chemicals and reagents

Musa basjoo obtained from Nanning, Guangxi, China. Rhodamine B (RhB), methyl orange (MO), sulfamethoxazole (SMX), Trimethoprim (TMP), carbamazepine (CBZ), tetracycline (TC), tert-butyl alcohol (TBA), 1,4-benzoquinone (BQ), phenol, methanol (MeOH), tert-butyl alcohol (TBA), p-benzoquinone (p-BQ) and furfuryl alcohol (FFA), Potassium perchlorate (KClO<sub>4</sub>), sodium sulfate (NaSO<sub>4</sub>), hydrochloride acid (HCl), and sodium hydroxide (NaOH) were purchased from Aladdin Reagent Co. Ltd. (Shanghai, China). peroxymonosulfate (PMS, available as Oxone<sup>®</sup> (KHSO<sub>5</sub>·0.5KHSO<sub>4</sub>·0.5K<sub>2</sub>SO<sub>4</sub>)), 5,5-dimethyl-1-pyrroline (DMPO), 2,2,6,6-tetramethyl-4-piperidinol (TEMP, 99%), Foetal Bovine Serum (FBS) and pheochromocytoma (PC12) cells were purchased from Sigma-Aldrich. Differentiated PC12 cells were purchased from Type Culture Collection of Chinese Academy of Sciences. All of the chemicals employed were analytical grade and were used without further purification.

## Characterization

The transmission electron microscopy (TEM) images were carried out on an accelerating voltage of 200 kV (Talos-S, FEI, USA). X-ray diffraction (XRD) patterns were performed on a PANalytical X' Pert PRO powder diffractometer using Cu K $\alpha$  radiation ( $\lambda = 0.1541$  nm). The fourier transform infrared (FTIR) spectroscopy obtained on a Nexus 670 FTIR spectrometer with KBr as the diluents. X-ray photoelectron spectroscopy (XPS) data were obtained on PerkinElmer PHI 5000 C instrument with a monochromatized Al K $\alpha$  line source (200 W). Raman spectra were obtained from a LabRAM HR Evolution (HORIBA, Japan) spectrometer. The Brunauer–Emmett–Teller (BET) surface area was obtained from the nitrogen adsorption and desorption isotherms recorded at 77 K using an ASAP 2460 analyzer (Micromeritics, USA). The electron paramagnetic resonance (EPR) measurements were carried out on a Bruker Model A300 spectrometer. The liner sweeps voltammetry (LSV) and electrochemical impedance measurements (EIS) were performed on a CHI 670E electrochemical workstation (CH Instrument, USA) using a three-electrode quartz

cell. The functioning electrode was produced as follows: Photocatalysts (20 mg) were disseminated in isopropanol (300  $\mu\text{L}$ ) and 5% Nafion solution (50  $\mu\text{L}$ ) for 5 minutes of vigorous oscillations. The suspension (40  $\mu\text{L}$ ) was dip-coated on ITO and dried overnight at room temperature. The reference and counter electrodes were Pt flake and Ag/AgCl (saturated KCl), respectively. A 0.1 M aqueous solution of  $\text{Na}_2\text{SO}_4$  was used as the supporting electrolyte. The cells were cultured in dulbecco's modified eagle medium (DMEM) supplemented with 10% FBS, in a humidified incubator (5%  $\text{CO}_2$ ,  $37^\circ\text{C}$ ). MBB-800 was dissolved in 1% MeOH. PC12 cells were in 1% MeOH and 5  $\mu\text{g mL}^{-1}$ , 10  $\mu\text{g mL}^{-1}$ , 50  $\mu\text{g mL}^{-1}$ , and 100  $\mu\text{g mL}^{-1}$  of MBB-800 for 24 h.

## Degradation Experiment

To compare the SMX degradation kinetic rate, the kinetic data were fitted with the pseudo-first-order model as follows:

$$\ln \frac{C_0}{C_t} = Kt \quad (\text{S1})$$

where  $C_0$  is the initial solution concentration ( $\text{mg L}^{-1}$ ),  $C_t$  is the concentration at time  $t$  ( $\text{mg L}^{-1}$ ), and  $K$  ( $\text{min}^{-1}$ ) is the rate constant for the pseudo-first-order kinetic models. Further, the effect of the initial pH was investigated by adjusting the pH to 2.1–10.2 using 0.01 M NaOH or HCl.

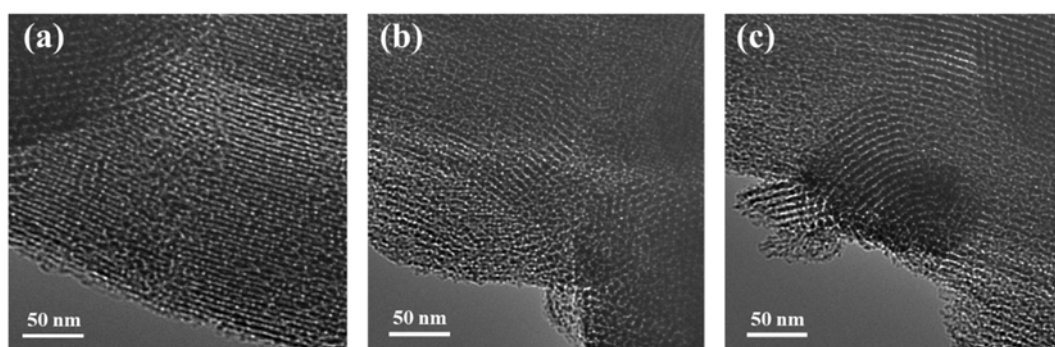

**Figure S1.** TEM images of (a) MBB, (B) MBB-400, and (c) MBB-600.

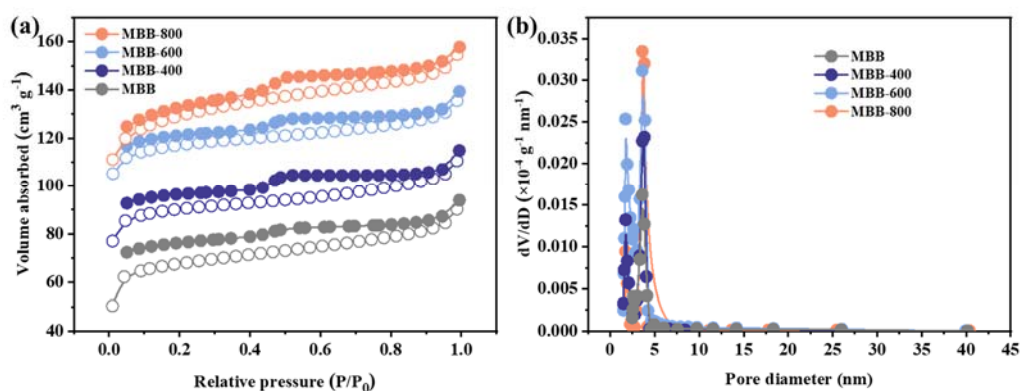

**Figure S2.** (a) N<sub>2</sub> adsorption–desorption isotherms and (b) pore size distribution of different samples.

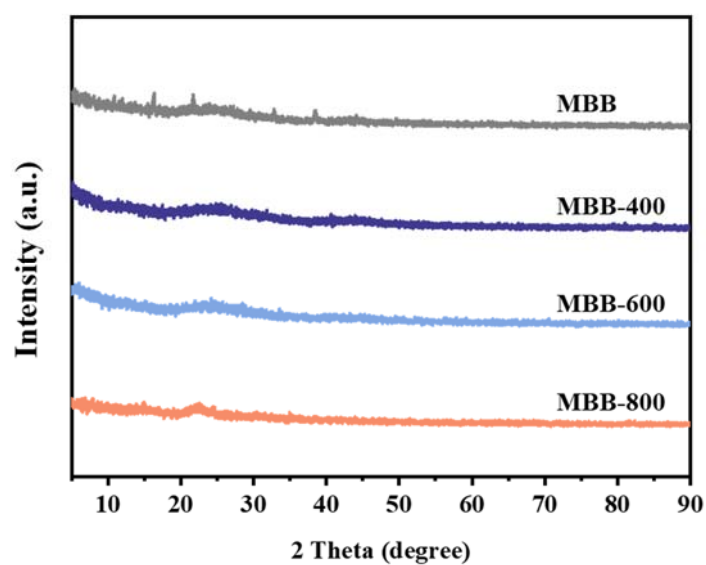

**Figure S3.** XRD patterns of different samples.

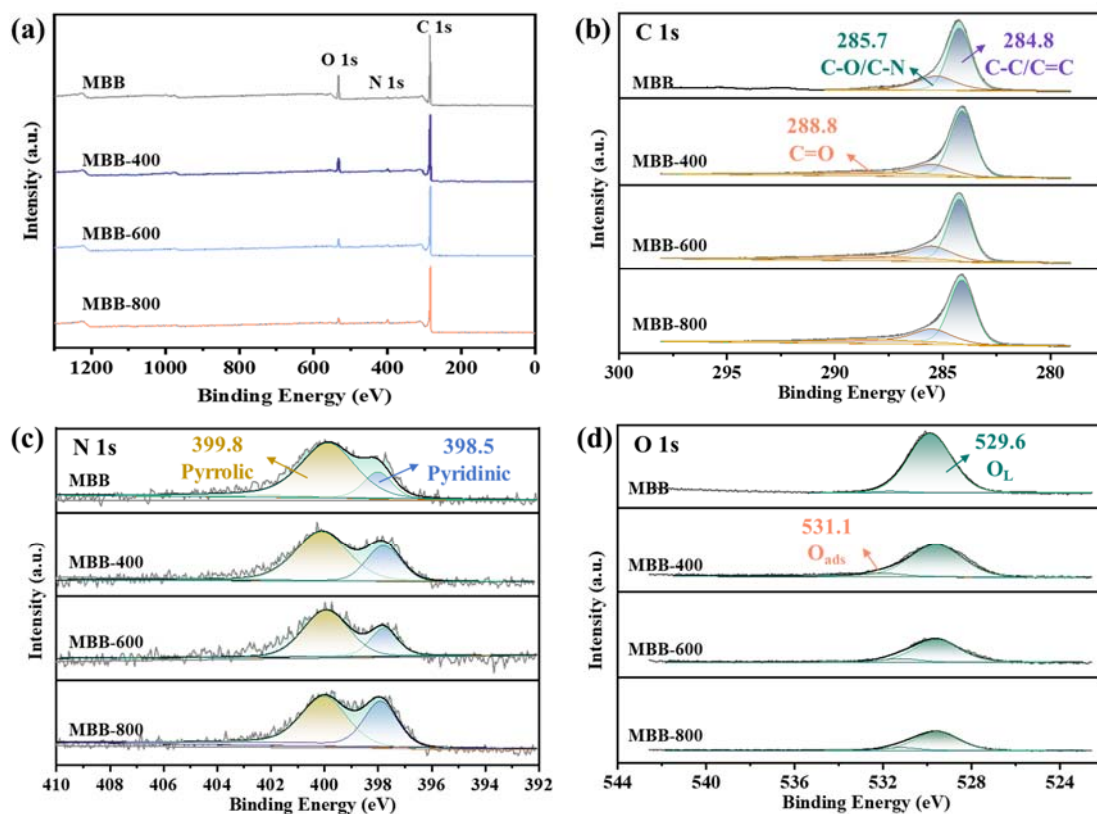

**Figure S4.** (a) Full-range scan, (b) C 1s, (c) N 1s, and (d) O 1s XPS spectrum of different samples.

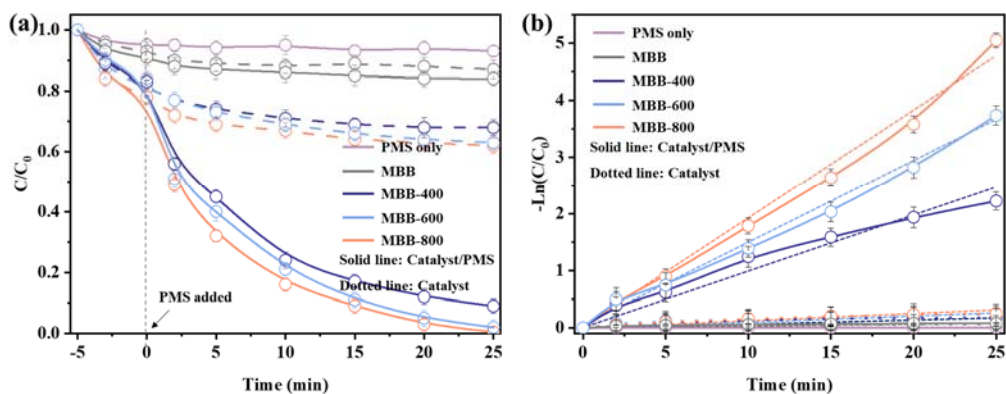

**Figure S5.** Removal (a) efficiency and (b) kinetics of SMX in different systems.

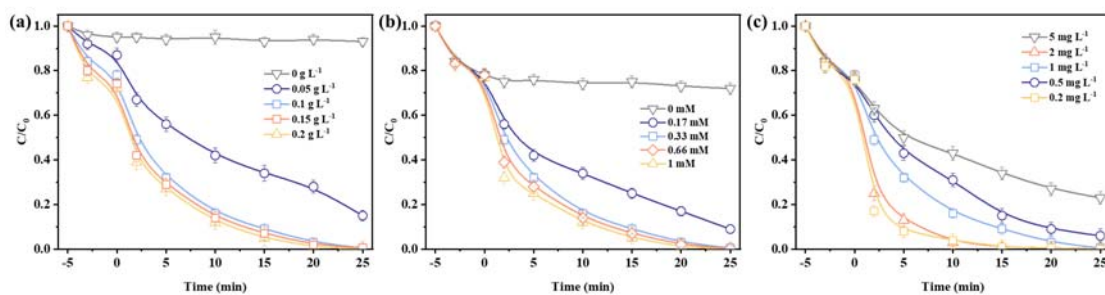

**Figure S6.** SMX degradation in MBB-800/PMS system under different conditions: (a) catalyst dosage, (b) PMS concentration, (c) SMX concentration. Reaction conditions:  $[\text{MBB-800}] = 0.1 \text{ g L}^{-1}$ ,  $[\text{PMS}] = 0.33 \text{ Mm}$ ,  $[\text{SMX}] = 1 \text{ mg L}^{-1}$ ,  $\text{pH} = 6.8$ .

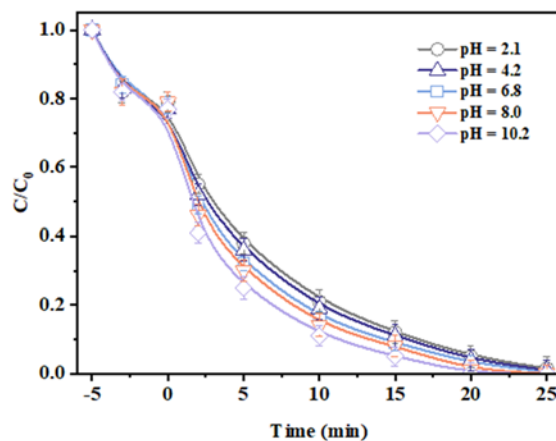

**Figure S7.** SMX degradation in MBB-800/PMS system under different pH value. Reaction conditions:  $[\text{MBB-800}] = 0.1 \text{ g L}^{-1}$ ,  $[\text{PMS}] = 0.33 \text{ Mm}$ ,  $[\text{SMX}] = 1 \text{ mg L}^{-1}$ .

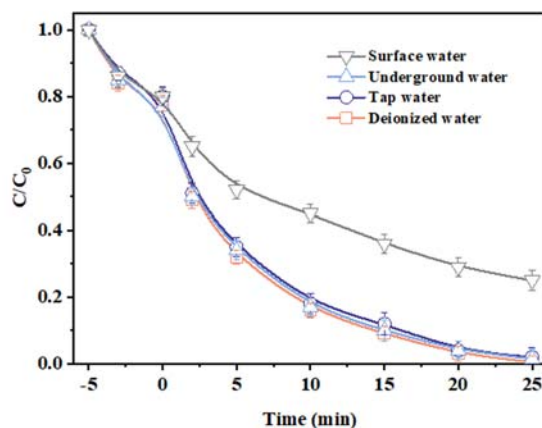

**Figure S8.** SMX degradation in MBB-800/PMS system under different water matrices. Reaction conditions:  $[\text{MBB-800}] = 0.1 \text{ g L}^{-1}$ ,  $[\text{PMS}] = 0.33 \text{ Mm}$ ,  $[\text{SMX}] = 1 \text{ mg L}^{-1}$ ,  $\text{pH} = 6.8$ .

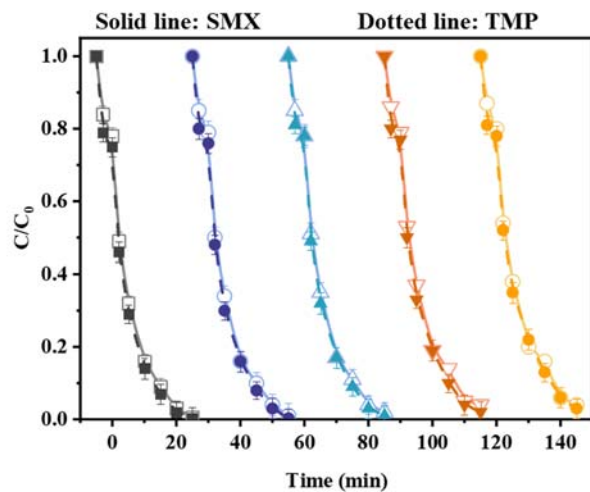

**Figure S9.** The reusability of degradation SMX and TMP in MBB-800/PMS system.  
 Reaction conditions:  $[\text{MBB-800}] = 0.1 \text{ g L}^{-1}$ ,  $[\text{PMS}] = 0.33 \text{ mM}$ ,  $[\text{SMX}] = 1 \text{ mg L}^{-1}$ ,  
 $[\text{TMP}] = 1 \text{ mg L}^{-1}$ ,  $\text{pH} = 6.8$ .

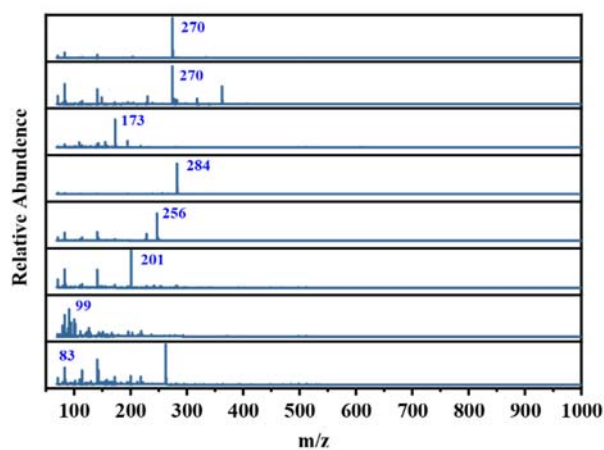

**Figure S10.** MS spectra of degradation intermediates of SMX in MBB-800/PMS system.

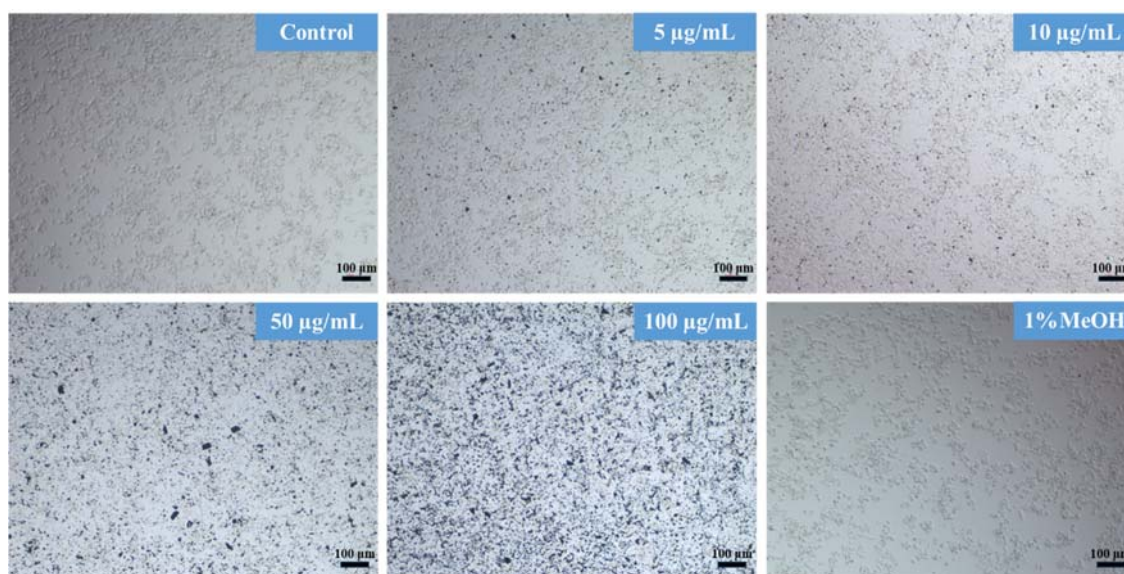

**Figure S11.** Images of PC12 cells under the microscope with different concentration of MBB-800 for 24h. Scale bar =100  $\mu\text{m}$ .

**Table S1** Physicochemical properties of different catalysts.

| Catalyst | Total pore volume<br>( $V_{\text{tot}}$ )<br>$\text{cm}^3 \text{g}^{-1}$ | Micropore volume<br>( $V_{\text{mic}}$ )<br>$\text{cm}^3 \text{g}^{-1}$ | BET surface area<br>( $S_{\text{BET}}$ )<br>$\text{m}^2 \text{g}^{-1}$ |
|----------|--------------------------------------------------------------------------|-------------------------------------------------------------------------|------------------------------------------------------------------------|
| MBB      | 0.1453                                                                   | 0.0848                                                                  | 260.7                                                                  |
| MBB-400  | 0.1776                                                                   | 0.1250                                                                  | 348.5                                                                  |
| MBB-600  | 0.2156                                                                   | 0.1651                                                                  | 451.4                                                                  |
| MBB-800  | 0.2441                                                                   | 0.1666                                                                  | 491.4                                                                  |

**Table S2** Peak fitting results of XPS analysis of MBBs.

| Catalyst | Atomic Concentrationa (%) |         |         |       |                    |                |                  |
|----------|---------------------------|---------|---------|-------|--------------------|----------------|------------------|
|          | C 1s                      |         |         |       | O 1s               |                |                  |
|          | $C_{\text{total}}$        | C–C/C=C | C–O/C–N | C=O   | $O_{\text{total}}$ | $O_{\text{L}}$ | $O_{\text{ads}}$ |
| MBB      | 83.70                     | 58.64   | 23.47   | 1.60  | 15.23              | 15.23          | 0                |
| MBB-400  | 90.08                     | 61.13   | 20.57   | 8.37  | 6.87               | 6.46           | 0.41             |
| MBB-600  | 92.61                     | 57.92   | 25.59   | 9.10  | 4.75               | 4.17           | 0.58             |
| MBB-800  | 94.25                     | 55.91   | 26.50   | 11.84 | 3.89               | 3.30           | 0.59             |



**Table S3** The comparison of different catalysts for SMX degradation in PMS activation.

| Catalysts                                           | SMX<br>( $\mu\text{m}$ ) | Catalyst dosage<br>( $\text{g L}^{-1}$ ) | PMS<br>( $\text{mM}$ ) | Degradation<br>rate (%) | $k$<br>( $\text{min}^{-1}$ ) | TOF<br>( $\text{min}^{-1}$ ) | Ref.             |
|-----------------------------------------------------|--------------------------|------------------------------------------|------------------------|-------------------------|------------------------------|------------------------------|------------------|
| NRGO                                                | 40.0                     | 0.5                                      | 0.80                   | 91.7                    | 0.010                        | 0.020                        | [1]              |
| PAM-Co-C                                            | 39.5                     | 2.0                                      | 0.33                   | 99.3                    | 0.113                        | 0.057                        | [2]              |
| Se-g-C <sub>3</sub> N <sub>4</sub>                  | 39.5                     | 0.2                                      | 1.30                   | 93.0                    | 0.015                        | 0.075                        | [3]              |
| FeO <sub>y</sub> /S-g-C <sub>3</sub> N <sub>4</sub> | 40.0                     | 0.5                                      | 0.80                   | 100                     | 0.060                        | 0.120                        | [4]              |
| Nano-bim Co/Fe oxides                               | 40.0                     | 0.2                                      | 0.40                   | 100                     | 0.057                        | 0.285                        | [5]              |
| 40MF                                                | 40.0                     | 0.1                                      | 0.16                   | 92.9                    | 0.067                        | 0.335                        | [6]              |
| $\alpha$ -Fe <sub>2</sub> O <sub>3</sub> -VO        | 10                       | 0.1                                      | 0.1                    | 91.5                    | 0.040                        | 0.403                        | [7]              |
| Fe-Co-O-g-C <sub>3</sub> N <sub>4</sub>             | 40.0                     | 0.2                                      | 0.80                   | 100                     | 0.085                        | 0.425                        | [8]              |
| Co-NP                                               | 9.9                      | 0.1                                      | 0.15                   | 100                     | 0.064                        | 0.644                        | [9]              |
| MF                                                  | 40.0                     | 0.06                                     | 0.81                   | 90.0                    | 0.051                        | 0.848                        | [10]             |
| Ag <sub>2</sub> O-Ag eggshell                       | 40.0                     | 0.1                                      | 0.16                   | 94.7                    | 0.088                        | 0.877                        | [11]             |
| 0.5-Co-N@BC                                         | 40.0                     | 0.1                                      | 0.40                   | 99.6                    | 0.127                        | 1.267                        | [12]             |
| <b>SA Co(24)-N/C catalyst</b>                       | <b>4.0</b>               | <b>0.1</b>                               | <b>0.33</b>            | <b>100</b>              | <b>0.183</b>                 | <b>1.830</b>                 | <b>This work</b> |

## Reference

1. Wang, S.; Xu, L.; Wang, J. Nitrogen-Doped Graphene as Peroxymonosulfate Activator and Electron Transfer Mediator for the Enhanced Degradation of Sulfamethoxazole. *Chem. Eng. J.* **2019**, *375*, 122041, doi:10.1016/j.cej.2019.122041.
2. Bao, Y.; Shan, Y.; Lim, T.; Wang, R.; David, R. Polyacrylonitrile (PAN) - Induced Carbon Membrane with in-Situ Encapsulated Cobalt Crystal for Hybrid Peroxymonosulfate Oxidation- Filtration Process : Preparation , Characterization and Performance Evaluation. *Chem. Eng. J.* **2019**, *373*, 425–436, doi:10.1016/j.cej.2019.05.058.
3. Tian, Y.; Tian, X.; Zeng, W.; Nie, Y.; Yang, C.; Dai, C.; Li, Y.; Lu, L. Enhanced Peroxymonosulfate Decomposition into  $\cdot\text{OH}$  and  $^1\text{O}_2$  for Sulfamethoxazole Degradation over Se Doped g-C<sub>3</sub>N<sub>4</sub> Due to Induced Exfoliation and N Vacancies

Formation. *Sep. Purif. Technol.* **2021**, 267, 118664, doi:10.1016/j.seppur.2021.118664.

4. Wang, S.; Liu, Y.; Wang, J. Iron and Sulfur Co-Doped Graphite Carbon Nitride (FeOy/S-g-C<sub>3</sub>N<sub>4</sub>) for Activating Peroxymonosulfate to Enhance Sulfamethoxazole Degradation. *Chem. Eng. J.* **2020**, 382, 122836, doi:10.1016/j.cej.2019.122836.

5. Bao, Y.; Oh, W.; Lim, T.; Wang, R.; David, R.; Hu, X. Elucidation of Stoichiometric Efficiency, Radical Generation and Transformation Pathway during Catalytic Oxidation of Sulfamethoxazole via Peroxymonosulfate Activation. *Water Res.* **2019**, 151, 64–74, doi:10.1016/j.watres.2018.12.007.

6. Xu, X.; Lin, R.; Deng, X.; Liu, J. In Situ Synthesis of FeOOH-Coated Trimanganese Tetroxide Composites Catalyst for Enhanced Degradation of Sulfamethoxazole by Peroxymonosulfate Activation. *Sep. Purif. Technol.* **2021**, 275, 119184, doi:10.1016/j.seppur.2021.119184.

7. Qin, Q.; Liu, T.; Zhang, J.; Wei, R.; You, S.; Xu, Y. Facile Synthesis of Oxygen Vacancies Enriched  $\alpha$ -Fe<sub>2</sub>O<sub>3</sub> for Peroxymonosulfate Activation: A Non-Radical Process for Sulfamethoxazole Degradation. *J. Hazard. Mater.* **2021**, 419, 126447, doi:10.1016/j.jhazmat.2021.126447.

8. Wang, S.; Liu, Y.; Wang, J. Peroxymonosulfate Activation by Fe-Co-O-Codoped Graphite Carbon Nitride for Degradation of Sulfamethoxazole. *Environ. Sci. Technol.* **2020**, 54, 10361–10369, doi:10.1021/acs.est.0c03256.

9. Liu, F.; Zhou, H.; Pan, Z.; Liu, Y.; Yao, G.; Guo, Y.; Lai, B. Degradation of Sulfamethoxazole by Cobalt-Nickel Powder Composite Catalyst Coupled with Peroxymonosulfate: Performance, Degradation Pathways and Mechanistic Consideration. *J. Hazard. Mater.* **2020**, 400, 123322, doi:10.1016/j.jhazmat.2020.123322.

10. Guo, R.; Wang, Y.; Li, J.; Cheng, X.; Dionysiou, D.D. Applied Catalysis B: Environmental Sulfamethoxazole Degradation by Visible Light Assisted Peroxymonosulfate Process Based on Nanohybrid Manganese Dioxide Incorporating Ferric Oxide. *Appl. Catal. B Environ.* **2020**, 278, 119297, doi:10.1016/j.apcatb.2020.119297.

11. Gao, Y.; Zhao, Q.; Li, Y.; Li, Y.; Gou, J.; Cheng, X. Degradation of Sulfamethoxazole by Peroxymonosulfate Activated by Waste Eggshell Supported Ag<sub>2</sub>O-Ag Nano-Particles. *Chem. Eng. J.* **2021**, *405*, 126719, doi:10.1016/j.cej.2020.126719.
12. Gu, C.; Zhang, Y.; He, P.; Zhu, J.; Gan, M. Insights into Biochar Supported Atomically Dispersed Cobalt as an Efficient Peroxymonosulfate Activator for Sulfamethoxazole Degradation: Robust Performance, ROS and Surface Electron-Transfer Pathways. *Environ. Sci. Nano* **2022**, *9*, 3551–3561, doi:10.1039/d2en00490a.
